# Supplementary material
Source: PubMed Central journal article supplement (PMC6142209)
Supplement: pnas.1803208115.sapp.pdf [file pnas.1803208115.sapp.pdf]

## Supplementary Materials for

# Error-prone protein synthesis in parasites with the smallest eukaryotic genome

**Authors:**

Sergey V. Melnikov<sup>1</sup>, Keith D. Rivera<sup>2</sup>, Denis Ostapenko<sup>1</sup>, Arthur Makarenko<sup>2</sup>, Neil D. Sanscrainte<sup>3</sup>, James J. Becnel<sup>3</sup>, Mark J. Solomon<sup>1</sup>, Catherine Texier<sup>4</sup>, Darryl J. Pappin<sup>2</sup>, Dieter Söll<sup>1,4#</sup>

**Author Affiliation:**

<sup>1</sup> Department of Molecular Biophysics and Biochemistry, Yale University, New Haven, CT 06520, USA

<sup>2</sup> Cold Spring Harbor Laboratory, Cold Spring Harbor, NY 11724, USA

<sup>3</sup> United States Department of Agriculture–Agricultural Research Service, Center for Medical, Agricultural and Veterinary Entomology (CMAVE), Gainesville, FL 32608, USA

<sup>4</sup> Université Clermont Auvergne, CNRS, Laboratoire Microorganismes, Génome et Environnement, F-63000, Clermont-Ferrand, France

<sup>5</sup> Department of Chemistry, Yale University, New Haven, CT 06520, USA

**Corresponding Author:**

[dieter.soll@yale.edu](mailto:dieter.soll@yale.edu)

**Figure S1 | Sequence variations in the catalytic and tRNA-binding domains of microsporidian aminoacyl-tRNA synthetases.** (A-C) Crystal structures of eukaryotic aminoacyl-tRNA synthetases in complex with cognate tRNAs: TyrRS/tRNA<sup>Tyr</sup> from yeast *S. cerevisiae* (pdb id 2dlc) (A), GlyRS/tRNA<sup>Gly</sup> from human (pdb id 5e6m) (B), and TrpRS /tRNA<sup>Trp</sup> from human (pdb id 2ake) (C). Below each structure, multiple sequence alignments highlight residues (in red) that are predicted to form direct contacts with cognate tRNAs. The figure illustrates that, despite close evolutionary relationships between microsporidian species, microsporidian synthetases carry potentially deleterious mutations within tRNA-binding and catalytic domains, suggesting altered tRNA affinity or specificity of tRNA recognition by microsporidian synthetases.

**A**

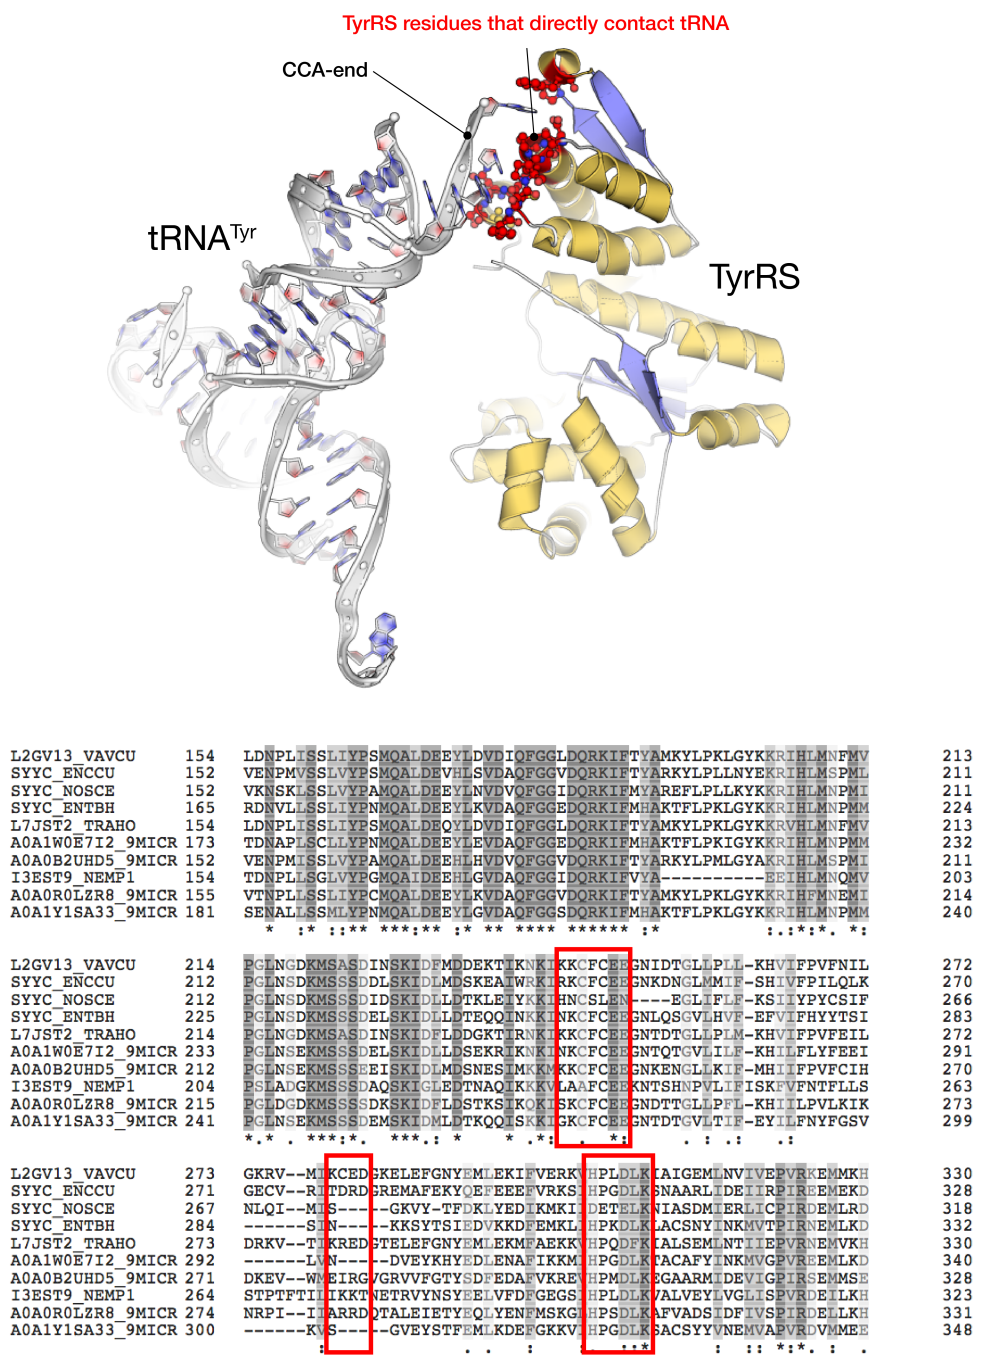







**Figure S2 | Multiple sequence alignments reveal degeneration of the editing domain in LeuRS from microsporidian parasites.** Position of the editing domain in the primary structure of microsporidian LeuRS (from *E. cuniculi*) is highlighted in yellow. To illustrate conservation of the editing domain across eukaryotic species, the sequences are shown for cytosolic LeuRS from *S. cerevisiae* (YEAST), *S. pombe* (SCHPO), *N. crassa* (NEUCR), *A. thaliana* (ARATH), *M. musculus* (MOUSE), *H. sapiens* (HUMAN).

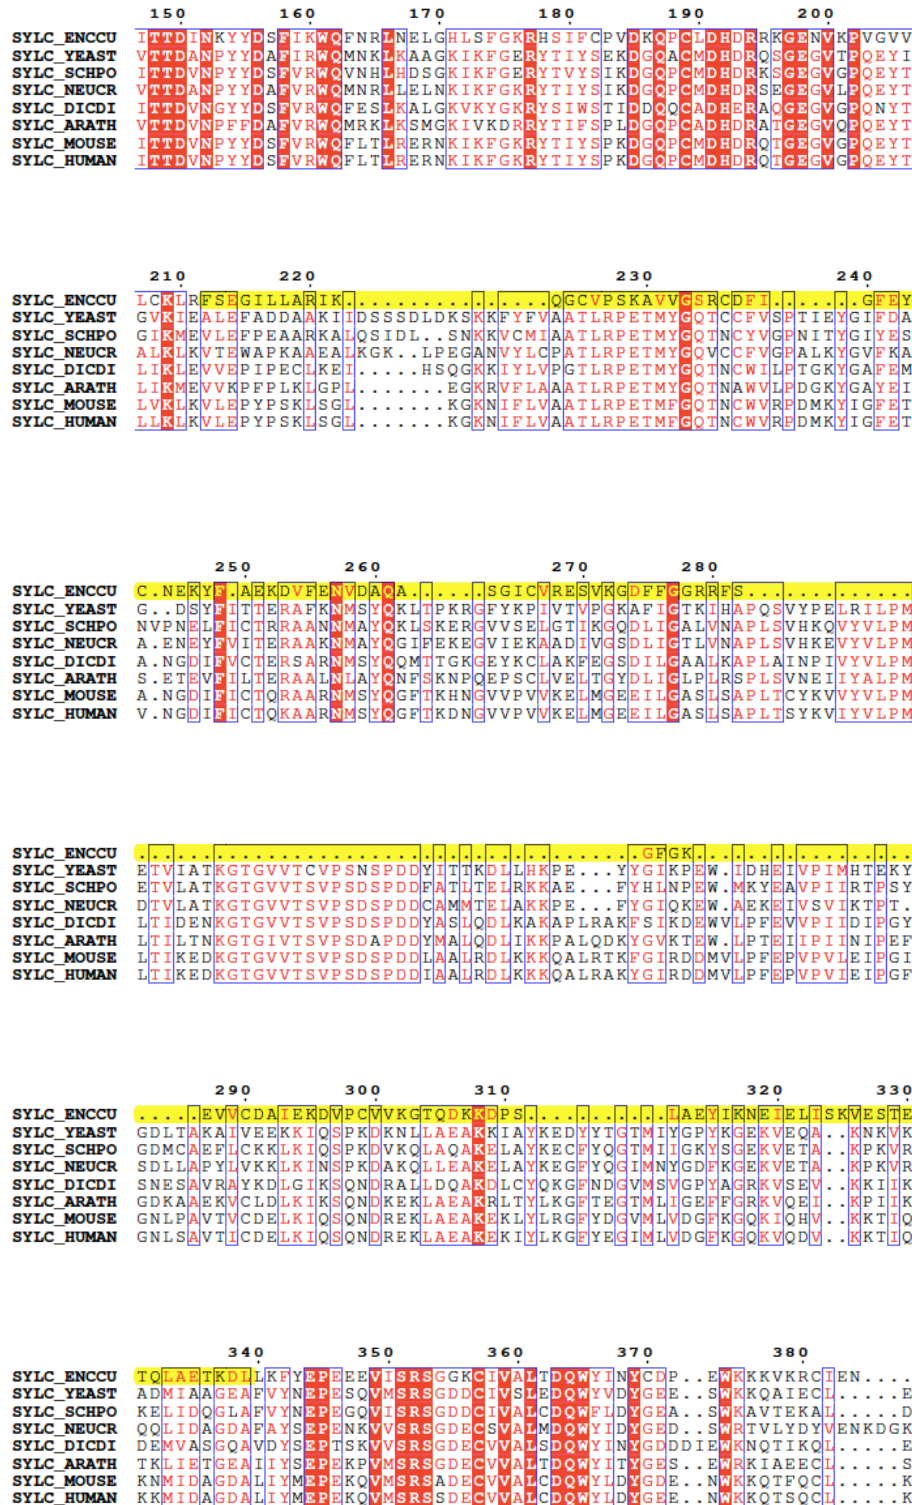

**Figure S3 | The “rudimentary” editing domain of microsporidian LeuRS is poorly conserved even across microsporidian species.** The multiple sequence alignment shows a fragment of LeuRS sequence from five microsporidian families: Encephalitozoonidea (*E. cuniculi*), Pleistophoridae (*T. hominis*), Nosematidea (*N. bombycis*), Ordosporidae (*O. colligata*) and Spraguidae (*S. lophii*). Position of the editing domain in the LeuRS primary structure is highlighted in yellow.

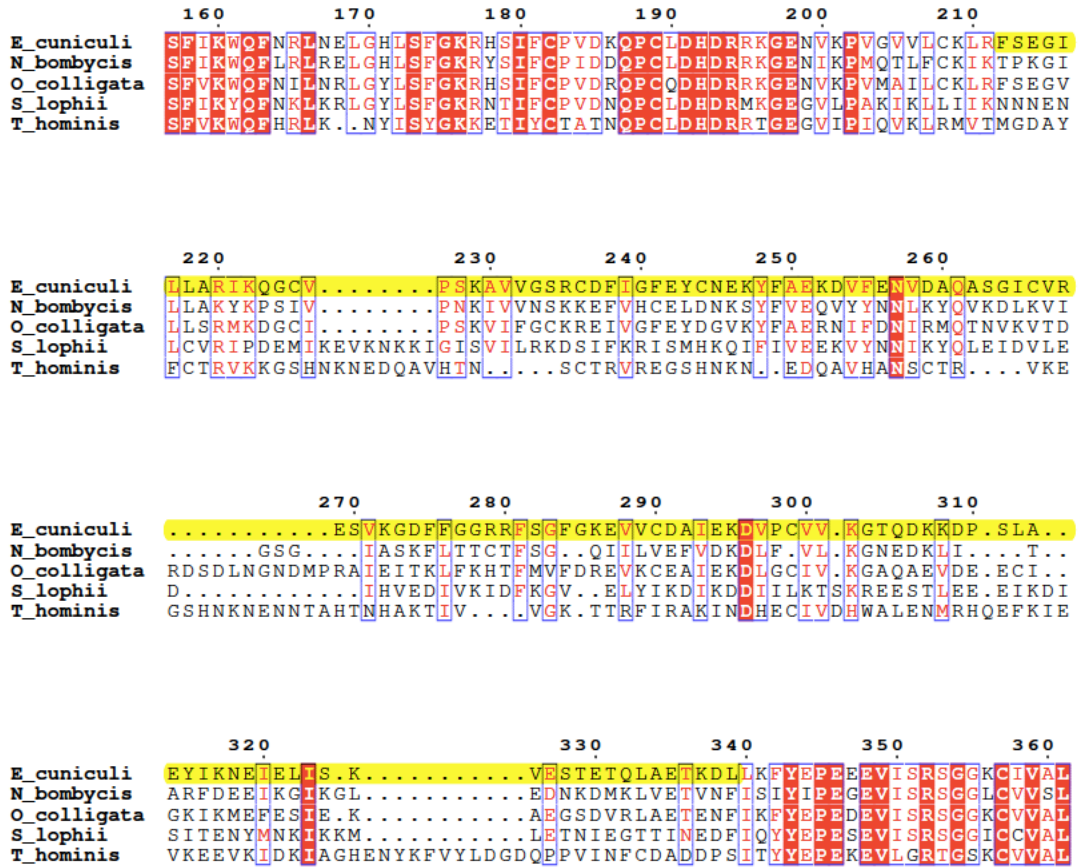

**Figure S4 | Purification, active site titration of *E. cuniculi* LeuRS.** (a) *E. cuniculi* LeuRS recombinantly expressed and purified from *E. coli* (1mg). (b) Active site titration to determine the active fraction of *E. cuniculi* LeuRS. (c) Side-by-side comparison of acid activation by *E. cuniculi* LeuRS (1  $\mu$ M *E. cuniculi* LeuRS in 150 mM Tris-HCl (pH 7.5), 10 mM MgCl<sub>2</sub>, 10 mM KF, 2.5 mM DTT, 0.05% BSA (w/v), 1 mM sodium pyrophosphate, 10 ATP mM,  $\gamma$ -[<sup>32</sup>P]-ATP (1000 cpu/ul final) and 2 mM amino acid after 1 minute at 37°C).

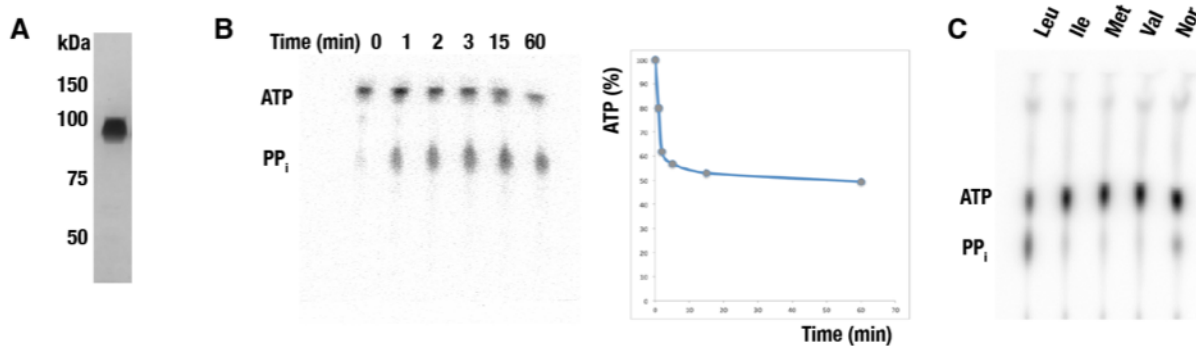

**Figure S5 | High conservation of the editing domains in microsporidian IleRS and ValRS synthetases.**

Multiple sequence alignments illustrate that IleRS (A) and ValRS (B) have conserved editing domains. Active site residues that are involved in recognition of near-cognate amino acids are outlined in red.

**A**

|                  |     |                                                                   |     |
|------------------|-----|-------------------------------------------------------------------|-----|
| SYIC_ENCCU       |     | RGFRVMPFSTACSTPLSNFESNQNYKDVSDPSVLIASFLLKPLG-----GYM              | 217 |
| L2GT06_VAVCU     |     | RGFRVMSFSTACSTPLSNFANLNRYEVNDPSVVVAFLKNDRFR-----GKD               | 217 |
| SYIC_ENTBH       |     | RGFKIMPFFSTACKTALSNEFASQNYKNVSDPSVLVTFKIIINPKDVLHNYENNDIE         | 225 |
| SYIC_NOSCE       |     | RGYRVMPFSTGCMTTLSSEAKSNYKMNVDLSVVVEFPLKSKLF-----DKK               | 218 |
| SYI_ANTLO        |     | RGHRVMPYSTACSTPLSNFANLNRYKDVSDPSILVAFPLRKPFFK-----GYS             | 136 |
| AOA098VMS0_9MICR |     | OGHKVLPYSTACTSPLSNFANLNRYKDIVDPFVVIVSLPLVDRPE-----                | 229 |
| E0S9X6_ENCIT     |     | RGFRVMPFSTACSTPLSNFESNQNYKDVSDPSVLIASFLLKPLFE-----GYK             | 217 |
| AOA0B2UIK5_9MICR |     | RGFRVMPFSTGCTPLSNFESNQNYKDVSDPSVLIASFLLSLE-----GQK                | 217 |
| I6TM96_ENCHA     |     | RGFRVMPFSTACSTPLSNFESNQNYKDVSDPSVLIASFLLALE-----GYK               | 217 |
| ROMDF6_NOSB1     |     | RGYKVMFPSSGCMTPLSNFEANQNYKNTLDPISIVVSFELKEDFE-----GHR             | 217 |
|                  |     | :*.: : * : * : * : * : * : * : * : * : * : * : * : * : * : * : *  |     |
| SYIC_ENCCU       | 218 | LSLVAITTTTPWTLPSNCGLVANPGLFYGVFEHK---EKFYLMHVDRIGEY-----FKDA      | 268 |
| L2GT06_VAVCU     | 218 | VSLAIIITTTTPWTLPSNLGVSVEPEFEYDIVDVN---GKFYVVHGNRKEFYS---VFESA     | 270 |
| SYIC_ENTBH       | 226 | IFFVAITTTTPWTLPCANCALVINPDYEMAFIYINNSKKLYIMLKNRIEYV-----FKQF      | 279 |
| SYIC_NOSCE       | 219 | VSILAITTTTPWTLPSNCGLVNPKDFDYQIFEIFD---HKFYCMLPNRIQDF-----NKKE     | 269 |
| SYI_ANTLO        | 137 | LSLVAITTTTPWTLPSHMAILVNSQSFIVAFIRLK---SAFFIMQRDRVNVY-----FKDA     | 187 |
| AOA098VMS0_9MICR | 230 | TSLLVITTTTPWTLPSNLAVIANPDLLYVEVLDTETSKKFIADALLSSIIYKDVSDTSESF     | 289 |
| E0S9X6_ENCIT     | 218 | LSLVAITTTTPWTLPSNCALVVNPEFSYVGIPEEK---QKFYLMHVNRVEEY-----FKDA     | 268 |
| AOA0B2UIK5_9MICR | 218 | VSMIAITTTTPWTLPCANCALVVNPEFVIVMFEHK---TGCYLMCEQRVDEY-----FKDV     | 268 |
| I6TM96_ENCHA     | 218 | VSLVAITTTTPWTLPSNCALVVNSEFEGYGIPEHK---QRFYLMHVGRIGEY-----FKDA     | 268 |
| ROMDF6_NOSB1     | 218 | TSFLIITTTTPWTLPSNCGCVLNESFTYVLFLEAN---GKRYIIVETRVVEY-----FKDF     | 268 |
|                  |     | : : * : * : * : * : * : * : * : * : * : * : * : * : * : * : * : * |     |
| SYIC_ENCCU       | 269 | RILQR-VSGRELEGLYEQPEYFEEYRK-KGFFRVLASGFTDTDGTGVNHCAPCFSE          | 326 |
| L2GT06_VAVCU     | 271 | KAVDK-VKSELIGLHYEPPDYFKKD-F-SGFFKVLRNEATDSDGTGINHMAPAFSEE         | 327 |
| SYIC_ENTBH       | 280 | CITTV-ILGKELIGVSYATLNYYENYIT-RGFFKTIIGNFVITITDGSIVHAPAFSEE        | 337 |
| SYIC_NOSCE       | 270 | VILHELEKCELLIGLEEQPEYFEEYRR-CGFFKIIGGSFVSDTDGTGINHAPAFSEE         | 328 |
| SYI_ANTLO        | 188 | VVISE-VKGHELLLHLDQPMYYNHYRE-KGFFRVYHADVFSEIDGTGVNHCSPCFSE         | 245 |
| AOA098VMS0_9MICR | 290 | KRISS-FKGCCLKGLSYQQPEPIFESRRASHGNFVITDPTADAGTGLVHCAPAFSEE         | 348 |
| E0S9X6_ENCIT     | 269 | KILKR-ISGSELEGLYEQPEYFEEYRK-KGFFRVYVSGFVTDTDGTGINHAPCFSES         | 326 |
| AOA0B2UIK5_9MICR | 269 | KVIK-MNGNVLEGLYEPPERFYFEEYRK-KDFFKVLGSGFVTDSDGTGINHAPCFSES        | 326 |
| I6TM96_ENCHA     | 269 | KVLR-ISGQRELEGLYEQPEYFEEYRK-KGFFRVYVTSGFVTDTDGTGVNHCAPCFSES       | 326 |
| ROMDF6_NOSB1     | 269 | KIIEK-ISGKDLVGLYQPEYFEEHLRK-FGYFRLYAGDFVTDSDGTGINHAPCFSES         | 326 |
|                  |     | * : * : * : * : * : * : * : * : * : * : * : * : * : * : * : * : * |     |
| SYIC_ENCCU       | 327 | DYNVFEKGLIRENDLVPVCPVDENGRYTSEVRRY-----AGRYVKDCDKAILSD            | 375 |
| L2GT06_VAVCU     | 328 | DYNVFLKEGMIRENEVPCIIDDKGKFTSTD--F-----KNLYFKDADKPTMKA             | 374 |
| SYIC_ENTBH       | 338 | DYNIFLKLGLLKPDEIPPCHIDENGKFTIAMEKYVNVPINNDISLNGVYFKDADKILLQI      | 397 |
| SYIC_NOSCE       | 329 | DYNCFVENNLKQNDLVPVCPVDENGRYTAEVFDY-----KGIYVKDADKILLIKH           | 377 |
| SYI_ANTLO        | 246 | DYKAMTPGLIKENELLPSPLDENGRFNEEVPEY-----KGMHVKDADQSIKID             | 294 |
| AOA098VMS0_9MICR | 349 | DHRVSLANKIISENEAVPSTIDEKGFHEAGFFEG-----TSIPGSYFKDADKELLIKL        | 400 |
| E0S9X6_ENCIT     | 327 | DYNVFEKGLIRENDLVPVCPVDENGRYTSEVKDY-----AGKYVKDCDKAILLD            | 375 |
| AOA0B2UIK5_9MICR | 327 | DYNVFEKGLIRENDLVPVCPVDENGRYTDEVSEY-----AGMYVKDCDKKILEA            | 375 |
| I6TM96_ENCHA     | 327 | DYNVFEKGLIRENDLVPVCPVDENGRYTSEVKDY-----AGRYVKDCDKVILLSD           | 375 |
| ROMDF6_NOSB1     | 327 | DYNVFKYGLIKRNDLVPVCPVDENGRYTKAISDF-----EGLYIKDADPLILKA            | 375 |
|                  |     | * : . : : : * : * : * : * : * : * : * : * : * : * : * : * : *     |     |
| SYIC_ENCCU       | 376 | LRD--KVLNQRIVHKYPFCWRSDTPLLYKLVNWFVVKVDHVDSLLRNNEKINWVPEPDI       | 433 |
| L2GT06_VAVCU     | 375 | LGD--KLLWRGTIRHRYPYCWRSDTPLIYKIVPNWFIHISDLQEQLYALNEKIHVVPEPSI     | 432 |
| SYIC_ENTBH       | 398 | LKP--HLIYNSRIVHSYPFCWRSDTPLLYKLVNWFVKITDIREELLTQNKKINWIPETI       | 455 |
| SYIC_NOSCE       | 378 | LKE--KIFCVKQISHNYPFCWRSEKPLIYRVLVSSWFIKVSDSVDKLIKNEIINWVPEKDI     | 435 |
| SYI_ANTLO        | 295 | LGK--KILYEGKVYHRYPYCWRSDTPLIYKLVNWFVVRVKREIPRLLESNSTINWIPESI      | 352 |
| AOA098VMS0_9MICR | 401 | LKADRIVRQTHKHSYPFCWRSDTPLMFKAVPSWFIKRVTDHIPKLEENQAKTRWVPEANV      | 460 |
| E0S9X6_ENCIT     | 376 | IKD--KVLNQRIVHKYPFCWRSDTPLLYKLVNWFVVRVKVDHVDSLLRNNEEINWVPEPDI     | 433 |
| AOA0B2UIK5_9MICR | 376 | IKS--KVMNNRIVHKYPFCWRSDTPLLYKLVNWFVVRVKDVGRLRNNEKINWVPEGI         | 433 |
| I6TM96_ENCHA     | 376 | IKD--KVLNQRIVHKYPFCWRSDTPLLYKLVNWFVVRVDHVDSLLRNNEKINWVPEKDI       | 433 |
| ROMDF6_NOSB1     | 376 | LGD--KLIINEKKHNNYPYCWRSPTPLIYKLVNWFIRVTDSDVDKLLANNEKINWVPEKDI     | 433 |



B

```
SYVC ENCCU      247  GVIYHFVKYPITADKGFSGDHLSLPTIEVATTRPPTILGDTAVCVNGRDCRFSPGEEKML      306
L2GU5_VAVCU    288  GVLVAIKYPLADK----GSSEVNDYIEIATTRPPTIGDTALCVNPMDKRAQYL-----      337
SYVC NOSCE     245  GVIYVFKYPVKFVK---DGYESEGHIEIATTRPPTILGDVALCANPKDARYTKY-----      295
A0A0B2UKR8_9MICR 244  GVIYHFVKYPLTCAEYKGCVSELPSEIATTRPPTILGDTAICANANDERFGSDGIRKMF      303
E0S6R6_ENCIT   247  GVIYHFVKYPMITDKFEFGDYLSPATEVATTRPPTILGDTAICVNGKDERFGARGIKETF      306
I6TU88_ENCHA   247  GVIYHFMYPIITDKKFGDHLSLPTIEVATTRPPTILGDTAICVNARDRRFNPEGIKKIF      306
I7AME9_ENCRO   247  GVIYHFRYPVTTDKFEFGDYLSPATEVATTRPPTILGDTGICVNRKDRRFSPGEGIREIF      306
L7JZU4_TRAHO   272  GVLVAIKYPLADK----GSAEINDYVEIATTRPPTIGDTALCVNPMDKRAQYL-----      321
S7WDL5_SPRLO   268  GIIYAFYYKVGDE-----KIEVETTRPPTILGDSGLCINPNDKRYMHL-----      310
R0KLX1_NOSB1   259  GVIYQIKYLTSDG-----NFVEIQTRPPTIVGDVALCANPKDERYNKM-----      302
*:* * . *                *: *****:*:* * .:* * * *
```

```
SYVC ENCCU      307  GDVPHGCRIYGVNPLTRDVIPIVIFDDYADMSFGTGVKTPAPDANDFEVSKRRHGLPCKV      366
L2GU5_VAVCU    338  -----KGKVAINPITEEVIPIIFDEYADMEFGSGAIKTPAPDFNDLAKKHNLAIKN      391
SYVC NOSCE     296  -----DKIIPRNPITEEELSFVFDEAAEMDLESGLVKTAPADPIDFEIGKKNLKNIK      349
A0A0B2UKR8_9MICR 304  GDVSRDTKVYGVNPLTKRVIPIVIFDDYADMSFGTGVKTPAPDANDFEVSKRRHGLECIV      363
E0S6R6_ENCIT   307  GDVPEGSKLYCVNPLTSEVIPPVFFDDYADMSFGTGVKTPAPDANDFEVSKRRHGLPCKI      366
I6TU88_ENCHA   307  GDAVCGNDVYGVNPLTKEVPIPIVIFDDYADMSFGTGVKTPAPDANDFEVSKRRHGIPCKI      366
I7AME9_ENCRO   307  GDVPCECNIVGVNPLTREVIPVIFDDYADMSFGTGVKTPAPDANDFEVSKRRHNLACKA      366
L7JZU4_TRAHO   322  -----RTKVAINPITKEVPIPIIFDEYAEMEFGTGVKTPAPDFNDLAKKHGLAVKN      375
S7WDL5_SPRLO   311  -----KGKYAINPITEEQVPIIFDEYAQMDFGSGIVKTPAPDFNDFEVSKRRHGLKMI      364
R0KLX1_NOSB1   303  -----KDLTFINPLTGKEIPLIFDEHSVMDFGTGLKTPAPDPVDFEIGKRHGLEKLI      356
*:* * : .:* * : * .:* * * * * * * * * * * * * * * * * * * * * * * *
```

```
SYVC ENCCU      367  VFDEONRVVVEGEFVKGLKRFEARAVVSKLRDVGFLFVSKKGGH
L2GU5_VAVCU    392  VFNESNEVCVEGFYKMKRFYARIKVLLELLKDAGLFVSETGY
SYVC NOSCE     350  IFDNONKIIIEGNYYKLRDLARDLVVQTLKKNLFFVEKKPY
A0A0B2UKR8_9MICR 364  VFDEENKVSVEGEFVKGLGRFEARAVICDLKSMGLYVGGKGGH
E0S6R6_ENCIT   367  VFDEENRVIIEGEFVKGLKRFEARAVISKLTDIGLFVGGKEY
I6TU88_ENCHA   367  VFDEONKVTIEGEFVKMKRFEARAVSRLKDIGLFVEKGGY
I7AME9_ENCRO   367  VLDEONKVISEGEFVKMKRFEARAVVSKLDIGLFIKGGY
L7JZU4_TRAHO   376  VLNENNEVCVEGFYKMKRFYARIKVLLEYLRSTGLFVSETGY
S7WDL5_SPRLO   365  VIDDNKMT-VGKYKGMNRFDCREEIKDLTAKGLFVEARKY
R0KLX1_NOSB1   357  IFDNENKIFVEGPFVKGLKRFEARIKTIEFLKDKGLFVKVPY
*:* * .:* * : * .:* * * * * * * * * * * * * * * * * * * * * * *
```

| Organism                                 | Strain         | Genome size (Mb) | Total gene count |
|------------------------------------------|----------------|------------------|------------------|
| <i>Anncaliia algerae</i>                 | PRA109         | 17.53            | 5330             |
| <i>Anncaliia algerae</i>                 | PRA339         | 12.16            | 3661             |
| <i>Anncaliia algerae</i>                 | Undeen         | 13.82            |                  |
| <i>Edhazardia aedis</i>                  | USNM 41457     | 51.35            | 4262             |
| <i>Encephalitozoon cuniculi</i>          | EC1            | 2.24             | 1898             |
| <i>Encephalitozoon cuniculi</i>          | EC2            | 2.24             | 1902             |
| <i>Encephalitozoon cuniculi</i>          | EC3            | 2.24             | 1898             |
| <i>Encephalitozoon cuniculi</i>          | GB-M1          | 2.5              | 2126             |
| <i>Encephalitozoon hellem</i>            | ATCC 50504     | 2.25             | 2006             |
| <i>Encephalitozoon hellem</i>            | Swiss          | 2.18             | 1864             |
| <i>Encephalitozoon intestinalis</i>      | ATCC 50506     | 2.22             | 2011             |
| <i>Encephalitozoon romaleae</i>          | SJ-2008        | 2.19             | 1883             |
| <i>Enterocytozoon bieneusi</i>           | H348           | 3.86             | 3806             |
| <i>Hamiltosporidium tvaerminensis</i>    | OER-3-3        | 13.27            |                  |
| <i>Mitosporidium daphniae</i>            | UGP3           | 5.64             | 3428             |
| <i>Nematocida ausubeli</i>               | ERTm2          | 4.7              | 2831             |
| <i>Nematocida ausubeli</i>               | ERTm6          | 4.27             | 2544             |
| <i>Nematocida parisii</i>                | ERTm1          | 4.07             | 2724             |
| <i>Nematocida parisii</i>                | ERTm3          | 4.15             | 2788             |
| <i>Nosema bombycis</i>                   | CQ1            | 15.69            | 4643             |
| <i>Nosema ceranae</i>                    | BRL01          | 7.86             | 2678             |
| <i>Ordospora colligata</i>               | OC4            | 2.29             | 1879             |
| <i>Pseudoloma neurophilia</i>            | MK1            | 5.25             | 3676             |
| <i>Spraguea lophii</i>                   | 42_110         | 4.98             | 2596             |
| <i>Trachipleistophora hominis</i>        | Unknown strain | 8.5              | 3253             |
| <i>Vavraia culicissubsp. floridensis</i> |                | 6.12             | 2875             |
| <i>Vittaforma corneae</i>                | ATCC 50505     | 3.21             | 2340             |

**Table S1 | Microsporidian species with known genome sequences.** The table summarizes microsporidian species with known genome sequences, according to Microsporidia Data Bank (<http://microsporidiadb.org/>).

| Enzyme | <i>E. coli</i> | <i>V. culicis</i> | <i>S. cerevisiae</i> | <i>H. sapiens</i> |
|--------|----------------|-------------------|----------------------|-------------------|
| AlaRS  | 876            | 870               | 982                  | 967               |
| ArgRS  | 577            | 613               | 607                  | 661               |
| AsnRS  | 465            | 451               | 492                  | 552               |
| AspRS  | 590            | 457               | 557                  | 501               |
| CysRS  | 461            | 485               | 767                  | 748               |
| GlnRS  | 550            | 697               | 809                  | 775               |
| GluRS  | 471            | 656               | 708                  | 1714*             |
| GlyRS  | 689+303        | 565               | 687                  | 739               |
| HisRS  | 424            | 486               | 526                  | 509               |
| IleRS  | 939            | 1021              | 1073                 | 1266              |
| LeuRS  | 860            | 832               | 1090                 | 1176              |
| LysRS  | 505            | 508               | 591                  | 597               |
| MetRS  | 677            | 532               | 751                  | 900               |
| PheRS  | 795+327        | 501+557           | 595+503              | 508+589           |
| ProRS  | 572            | 497               | 688                  | 1714*             |
| SerRS  | 430            | 445               | 462                  | 505               |
| ThrRS  | 642            | 640               | 734                  | 724               |
| TrpRS  | 334            | 411               | 432                  | 475               |
| TyrRS  | 424            | 337               | 394                  | 528               |
| ValRS  | 951            | 917               | 1058                 | 1265              |

**Table S2 | Size of aminoacyl-tRNA synthetases in microsporidia compared to other species.** In *H. sapiens*, GluRS and ProRS are fused in one protein (marked with asterisk).

**Table S3 | Steady-state parameters for amino acid activation by LeuRS from yeast *S. cerevisiae* and microsporidium *E. cuniculi*.** The values represent the best fit value of three independent experiments in which a synthetase variant was freshly purified before the measurements. N/D stands for Not Detected due to insufficient activity.

| Substrate | <i>S. cerevisiae</i> |           | <i>E. cuniculi</i> |                         |
|-----------|----------------------|-----------|--------------------|-------------------------|
|           | Km (mM)              | Vmax      | Km (mM)            | Vmax (s <sup>-1</sup> ) |
| Leu       | 0.05 ± 0.01          | 96 ± 8    | 0.11 ± 0.02        | 9.8 ± 1.2               |
| Nva       | 2,6 ± 0.3            | 89 ± 9    | 2,3 ± 0.2          | 8.7 ± 1.1               |
| Val       | 57 ± 7               | 22 ± 3    | 78 ± 12            | 2.9 ± 0.4               |
| Ile       | 26 ± 3.4             | 3.7 ± 0.3 | 36 ± 4.8           | 0.35 ± 0.05             |
| Met       | 47 ± 9               | 5.8 ± 0.6 | 66 ± 6             | 0.23 ± 0.03             |
| Asp       | N/D                  | N/D       | N/D                | N/D                     |
